# Supplementary material
Source: publisher figshare collection journal article supplement (https://acs.figshare.com/ndownloader/files/5490542)
Supplement: Supplementary file 1 [file 5490542]

## Supporting Information

### Microcalorimetry Study of the Adsorption of Asphaltenes and Asphaltene Model Compounds at the Liquid-Solid Surface.

Diego Pradilla\*, Sreedhar Subramanian, Sébastien Simon, Johan Sjöblom, Isabelle Beurroies, Renaud Denoyel.

#### <sup>1</sup>H NMR spectra of BisAC11 and C5PeC11.

Figures S1 and S2 show the <sup>1</sup>H NMR spectra of the model compounds BisAC11 and C5PeC11 respectively measured on a 400 MHz apparatus and whose structure is shown in Table 3 of the main article. For both spectra, the interpretation of the peaks is in the figure caption. It is important to note that the peak located at  $\delta$  (ppm) 7.25 ppm corresponds to the solvent used for the measurement, in this case, CDCl<sub>3</sub>. The letters *m* and *t* denote multiplets and triplets respectively. Further details of the synthesis of these compounds can be found in Nordgård et al<sup>1</sup> and Wei et al<sup>2</sup>.

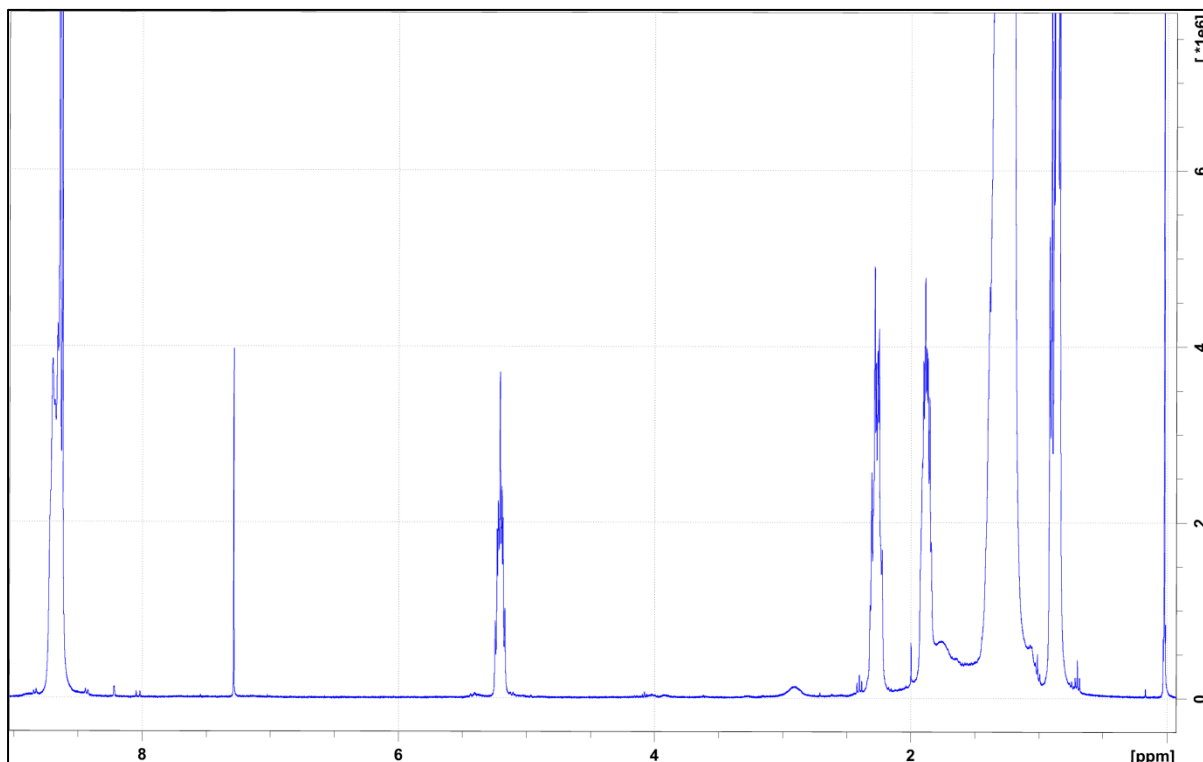

**Figure S1.** <sup>1</sup>H NMR spectrum of the compound BisAC11. The peaks are:  $\delta$  8.65 (8H, *m*, perylene),  $\delta$  5.2 (2H, *m*, 2 CHN),  $\delta$  2.25 (4H, *m*, CH<sub>2</sub>CHN),  $\delta$  1.85 (4H, *m*, CH<sub>2</sub>CHN),  $\delta$  1.2-1.4 (72H, *m*, 36 CH<sub>2</sub>),  $\delta$  0.85 (12H, *t*, CH<sub>3</sub>),  $\delta$  2.9 (small impurity).

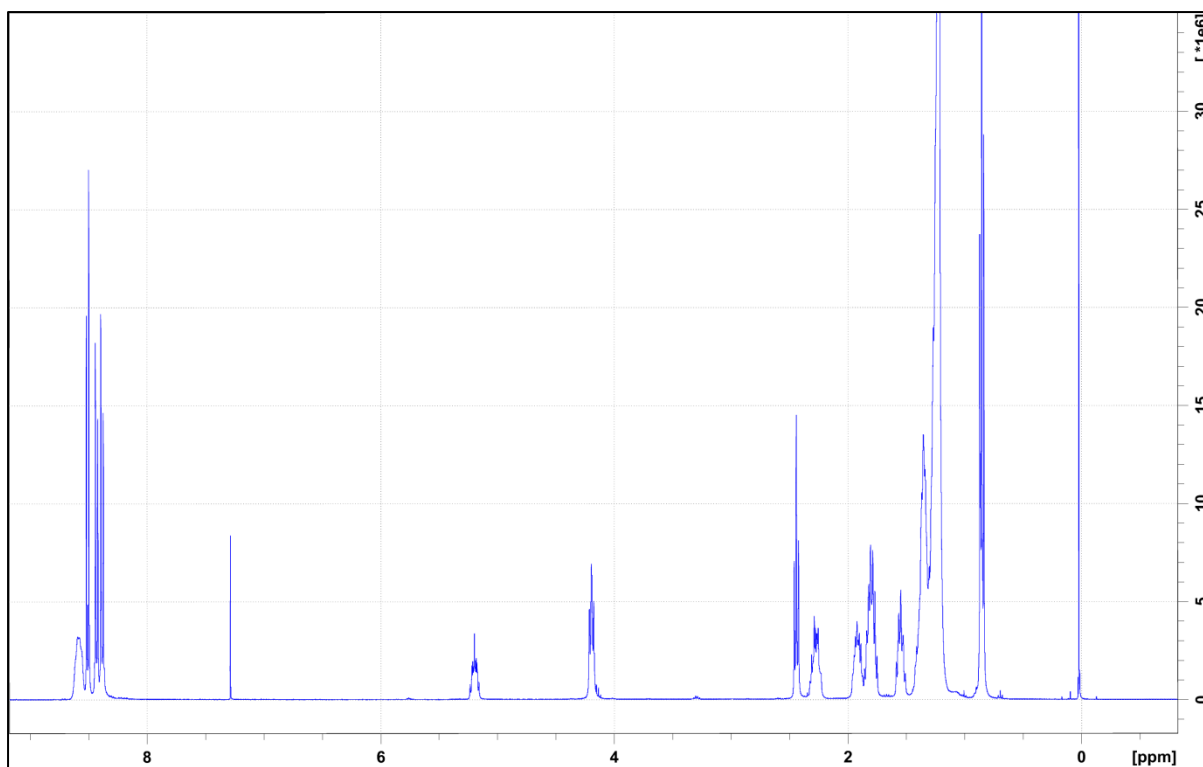

**Figure S2.**  $^1\text{H}$  NMR spectrum of the compound C5PeC11. The peaks are:  $\delta$  8.65 (8H, *m*, perylene),  $\delta$  5.2 (1H, *m*,  $\text{CH}_2\text{CHN}$ ),  $\delta$  4.2 (2H, *t*,  $\text{NCH}_2$  on the acidic side),  $\delta$  2.4 (2H, *t*,  $\text{HOOCCH}_2$ ),  $\delta$  2.25 (2H, *m*,  $\text{CH}_2\text{CHN}$ ),  $\delta$  2.0 – 1.0 (44H, *m*, 22  $\text{CH}_2$ ),  $\delta$  0.85 (6H, *t*,  $\text{CH}_3$ ).

### FTIR spectra of esterified and non-esterified asphaltenes.

Figure S3 shows the FTIR spectra of esterified and non-esterified asphaltenes. Interpretation of the characteristic peaks is as follows<sup>3-6</sup>. The stretching and bending vibrations of aliphatic  $-\text{CH}_2$  and  $-\text{CH}_3$  groups are located at 2920, 2850, 1450 and 1375  $\text{cm}^{-1}$  respectively; the stretching vibrations typical of aromatic rings are located at 1600  $\text{cm}^{-1}$ ; Their in- and out-of-plane bending vibrations are seen at 869, 810 and 745  $\text{cm}^{-1}$ . All these peaks are the same in figure S3, the only difference between the spectra is a peak located between 1720-1730  $\text{cm}^{-1}$  which corresponds to the stretching vibrations of C=O ester bonds (or the Carboxyl-Carbonyl area as defined by Juyal et al.<sup>7</sup>) indicating the complete replacement of the  $-\text{COOH}$  groups from the non-esterified asphaltenes. The peaks located between 2300-2400  $\text{cm}^{-1}$  correspond to the presence of  $\text{CO}_2$  in air.

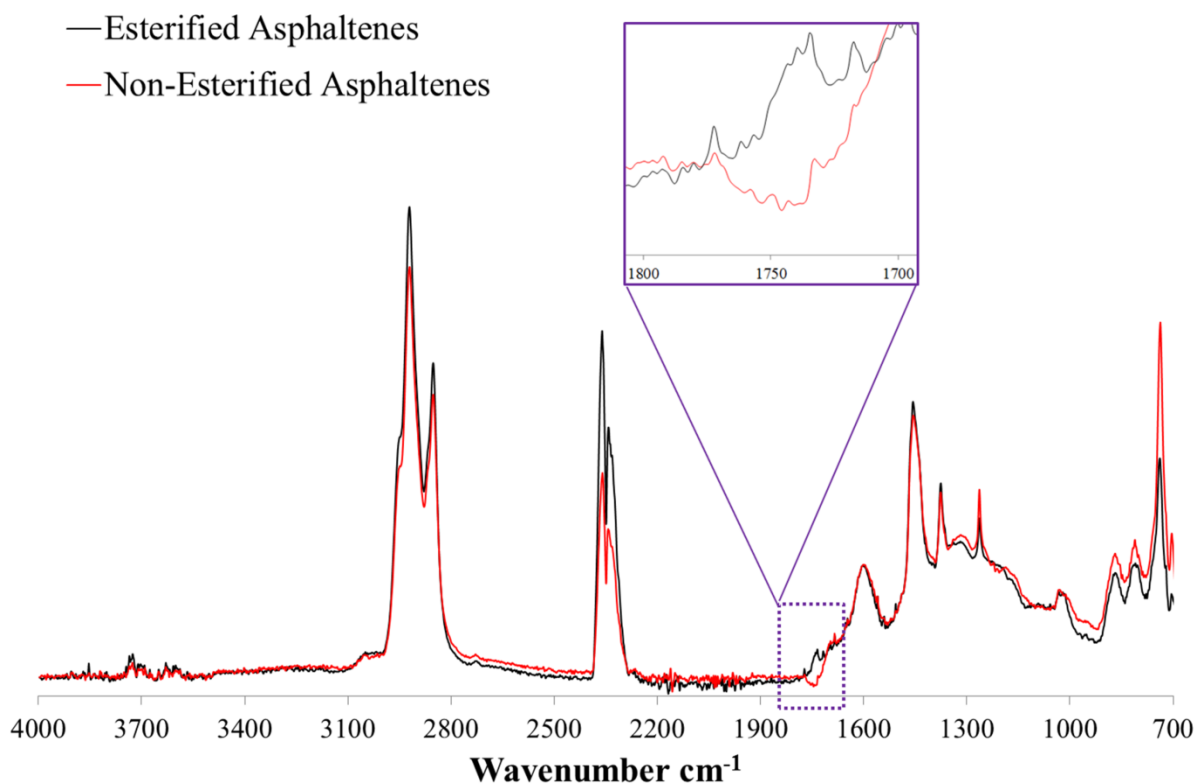

**Figure S3.** FTIR spectra of esterified and non-esterified asphaltenes. The inset shows a magnification of the peak between 1720-1730  $\text{cm}^{-1}$  which represents the stretching vibrations of C=O ester bonds.

**Table S1.** Weight percentage (% wt) of mass desorbed after 3 consecutive washouts with toluene determined through QCM-D measurements. The asphaltene concentration before the desorption step was 1.5 g/L.

| Surface         | Esterified Asphaltenes (wt%) | Non-esterified Asphaltenes (wt%) |
|-----------------|------------------------------|----------------------------------|
| Silica          | 22 ± 3                       | 16 ± 2                           |
| Stainless Steel | 15 ± 1                       | 19 ± 1                           |

1. Nordgård EL, Sjöblom J. Model compounds for asphaltenes and C80 isoprenoid tetraacids. Part I: Synthesis and interfacial activities. *Journal of Dispersion Science and Technology* 2008;29:1114-22.
2. Wei D, Orlandi E, Barriet M, Simon S, Sjöblom J. Aggregation of tetrameric acid in xylene and its interaction with asphaltenes by isothermal titration calorimetry. *Journal of Thermal Analysis and Calorimetry* 2015;122:463-71.
3. Sjöblom J, Aske N, Auflem IH, et al. Our current understanding of water-in-crude oil emulsions. Recent characterization techniques and high pressure performance. *Advances in Colloid and Interface Science* 2003;100-102:399-473.
4. Ese M-H, Galet L, Clause D, Sjöblom J. Properties of Langmuir Surface and Interfacial Films Built up by Asphaltenes and Resins: Influence of Chemical Demulsifiers. *Journal of Colloid and Interface Science* 1999;220:293-301.
5. Fossen M, Kallevik H, Knudsen KD, Sjöblom J. Asphaltenes Precipitated by a Two-Step Precipitation Procedure. 2. Physical and Chemical Characteristics. *Energy & Fuels* 2011;25:3552-67.
6. Simon S, Sjöblom J, Wei D. Interfacial and Emulsion Stabilizing Properties of Indigenous Acidic and Esterified Asphaltenes. *Journal of Dispersion Science and Technology* 2016:DOI: 10.1080/01932691.2015.1135808.
7. Juyal P, Merino-Garcia D, Andersen SI. Effect on Molecular Interactions of Chemical Alteration of Petroleum Asphaltenes. I†. *Energy & Fuels* 2005;19:1272-81.
